# Supplementary material for: STAT1 gain-of-function heterozygous cell models reveal diverse interferon-signature gene transcriptional responses
Source: PubMed Central journal article supplement (PMC8121859; doi:10.1038/s41525-021-00196-7), 2021-05-14
Supplement: 41525_2021_196_MOESM1_ESM.pdf [file 41525_2021_196_MOESM1_ESM.pdf]

## **Supplementary Material**

Supplementary Figure Legends: pages 2-3

Supplementary Figures: pages 4-13

Supplementary Tables: pages 14-29

## Supplementary Figure Legends

**Supplementary Figure 1. DNA content analysis demonstrates diploidy of HAP1 cells.** | (a) DNA content was measured in HAP1 (blue), wildtype human fibroblasts (known to be diploid; orange) and a 1:1 mixture of fibroblasts and HAP1 cells (red). DNA content was assessed by measuring the median fluorescence intensity (MFI) of a live cell DNA dye (Vybrant DyeCycle Violet™) across the cell cycle. MFI ratios between HAP1 and fibroblasts were calculated for the G<sub>0</sub>/G<sub>1</sub> phase (left peak) and G<sub>2</sub>/M phase (right peak). An MFI ratio of ~1 for both peaks indicate that the ploidy of HAP1 cells is identical to that of diploid fibroblasts. (b) Gating strategy used for DNA content analysis. Following exclusion of debris in the FSC-A/SSC-A window, doublets were excluded using FSC-A/FSC-H followed by the SSC-A/SSC-H parameters. Dead cells were excluded by plotting the G660-A (propidium iodide) fluorescence intensity vs. SSC-H. Events associated with G660-A fluorescence intensity higher than 10<sup>3</sup> were excluded. Finally, for all live single cells, fluorescence intensity of V450-A (Vybrant DyeCycle Violet™) was plotted as a histogram.

**Supplementary Figure 2. workflow for generating and verifying STAT1 mutants.** | HAP1 cells were seeded in a 12-well plate. Twenty-four hours later, cells were transfected by lipofection with plasmids containing the single-guide RNA (sgRNA) and the Cas9 base-editor, as well as a puromycin-resistance cassette. Following puromycin selection, cells were single-cell sorted into 96-well plates and clones. Following a 2-week expansion period, DNA was extracted from a sample of cells in each well, and genotyped by Sanger sequencing.

**Supplementary Figure 3. Uncropped immunoblot membranes presented in main manuscript.** | (a) Top: expression of pSTAT1 (Tyr701) compared with  $\alpha$ -tubulin loading control, following 60 minutes of stimulation with IFN $\gamma$  (10ng/mL), using long-exposure at time of imaging; Bottom: the same membrane as above, imaged using short-exposure. (b) Total STAT1 compared with  $\alpha$ -tubulin loading control following 60 minutes of stimulation with IFN $\gamma$  (10ng/mL). (c) pSTAT1 time-course at 0, 30, 60 and 120 minutes following stimulation with IFN $\gamma$  (10ng/mL), compared with  $\alpha$ -tubulin loading control. (d) pSTAT1 de-phosphorylation assay: pSTAT1 expression following stimulation with IFN $\gamma$  (10ng/mL) at 0, 30, 60 and 120 minutes following Ruxolitinib administration. Note: as fluorescent imaging may introduce artifact to protein ladders, colorimetric images of ladders for all blots are provided as well for each blot.

**Supplementary Figure 4. STAT1-associated gene transcription under various experimental conditions.** | (a) at baseline, constitutive Interferon-Stimulated Gene (ISG) expression is maintained at a basal level in an interferon (IFN)-independent manner via two unphosphorylated transcription complexes: unphosphorylated gamma activating factor (U-GAF) made up of two STAT1 units, and unphosphorylated interferon-stimulated gene factor 3 (U-ISGF3), made up of STAT1, STAT2 and IRF9. At baseline, mammalian target of rapamycin (mTOR) serves as an inhibitor of STAT1 migration to the nucleus, preventing excessive ISG transcription; (b) following nutrient depletion, mTOR is inhibited, allowing for higher nuclear accumulation unphosphorylated-STAT1 containing transcriptional complexes. This results in an ISG transcriptional response which is IFN-independent; (c) Stimulation with IFN $\alpha$  begins with ligation of the type I IFN receptor, made up of two subunits: IFNAR1 and IFNAR2. Receptor

ligation leads to recruitment of the tyrosine kinases TYK2 and JAK1, which cross-phosphorylate each other as well as the intracellular receptor domains. This creates a docking site for STAT1 and STAT2 which bind, are phosphorylated, and along with IRF9 form the transcription complex ISGF3. ISGF3 migrates to the nucleus where it binds to interferon-stimulated response element (ISRE) in gene promoters, resulting in a Type I IFN response; **(d)** Stimulation with IFN $\gamma$  begins with ligation of the type II IFN receptor, made up of two subunits each of IFNGR1 and IFNGR2. Receptor ligation leads to recruitment of the tyrosine kinases JAK1 and JAK2, which cross-phosphorylate each other as well as the intracellular receptor domains. This creates a docking site for STAT1 which bind, are phosphorylated, and form the homodimer GAF. GAF migrates to the nucleus where it binds to gamma-activating sequence (GAS) in gene promoters, resulting in a Type II IFN response.

**Supplementary Figures**  
**Supplementary Figure 1:**

**a**

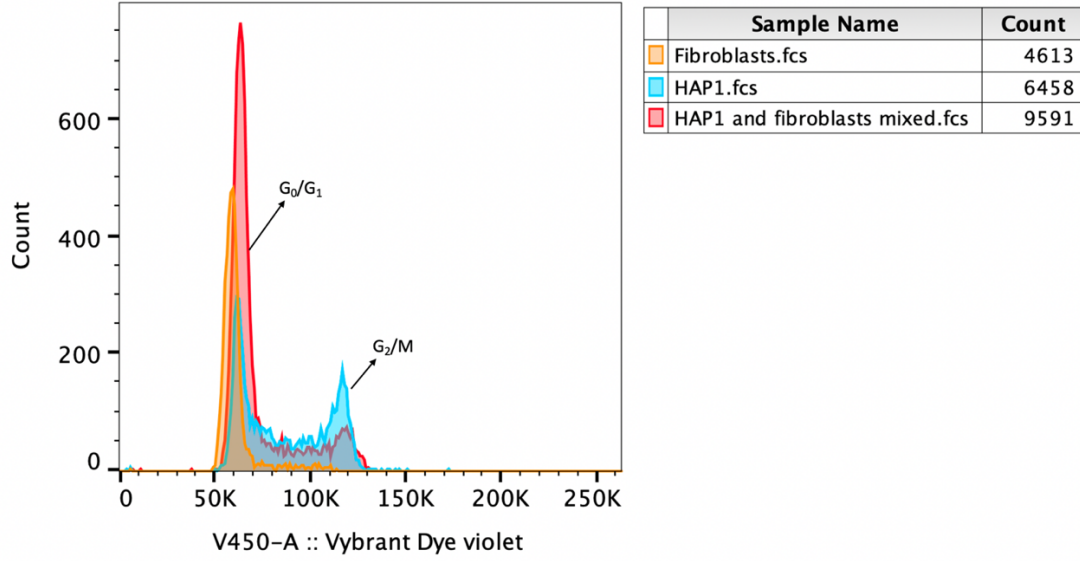

**b**

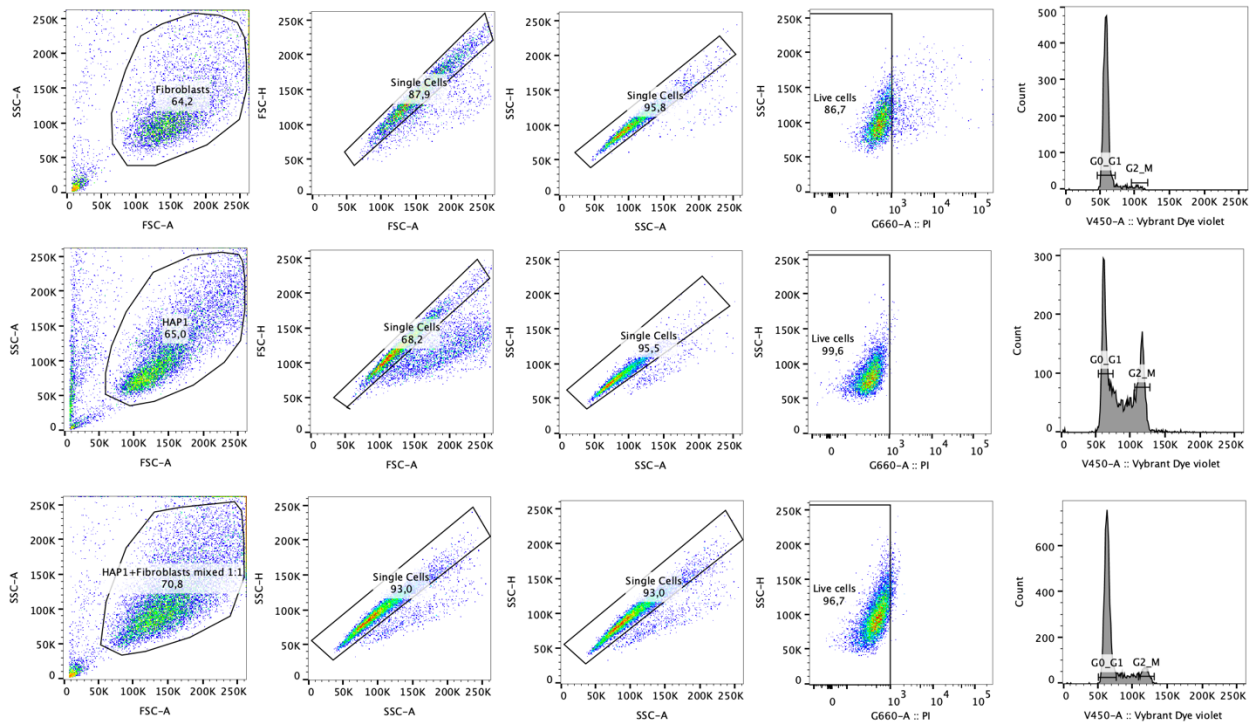

## Supplementary Figure 2:

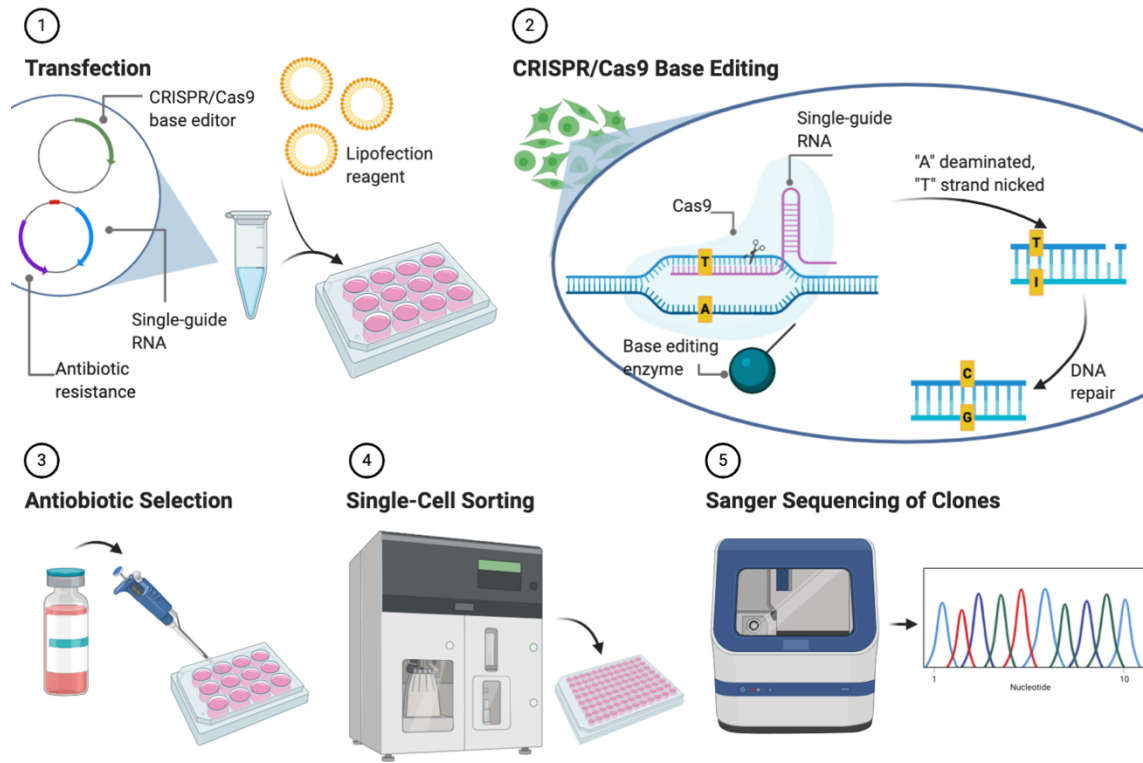

**Supplementary Figure 3:**

**(a)**

**Long-exposure:**

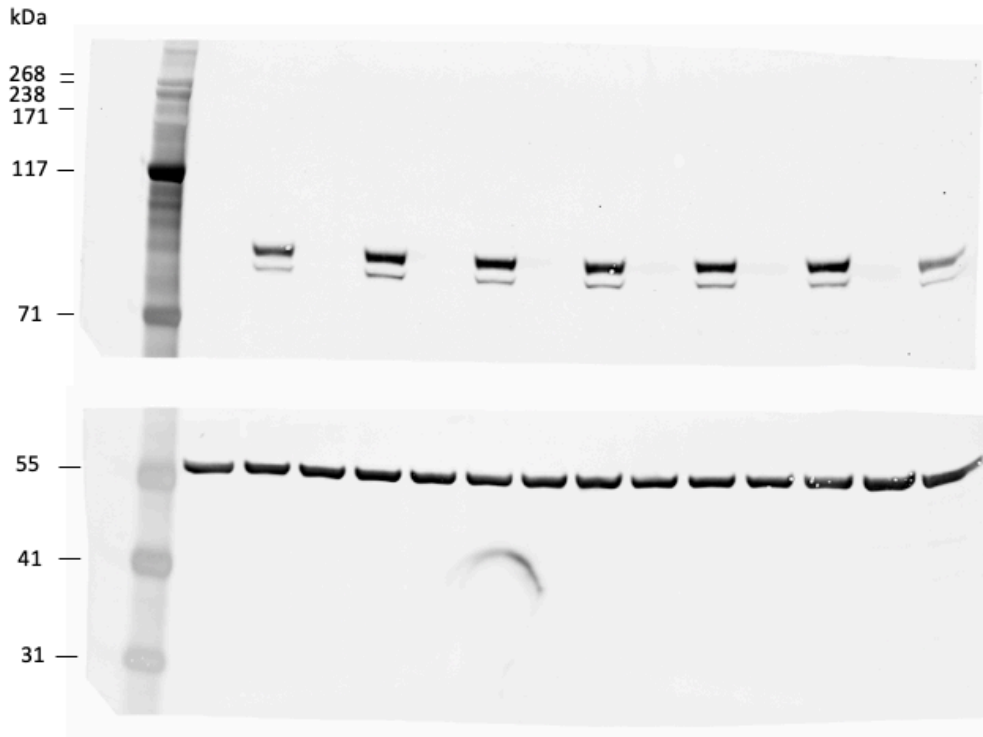

**Short-exposure:**

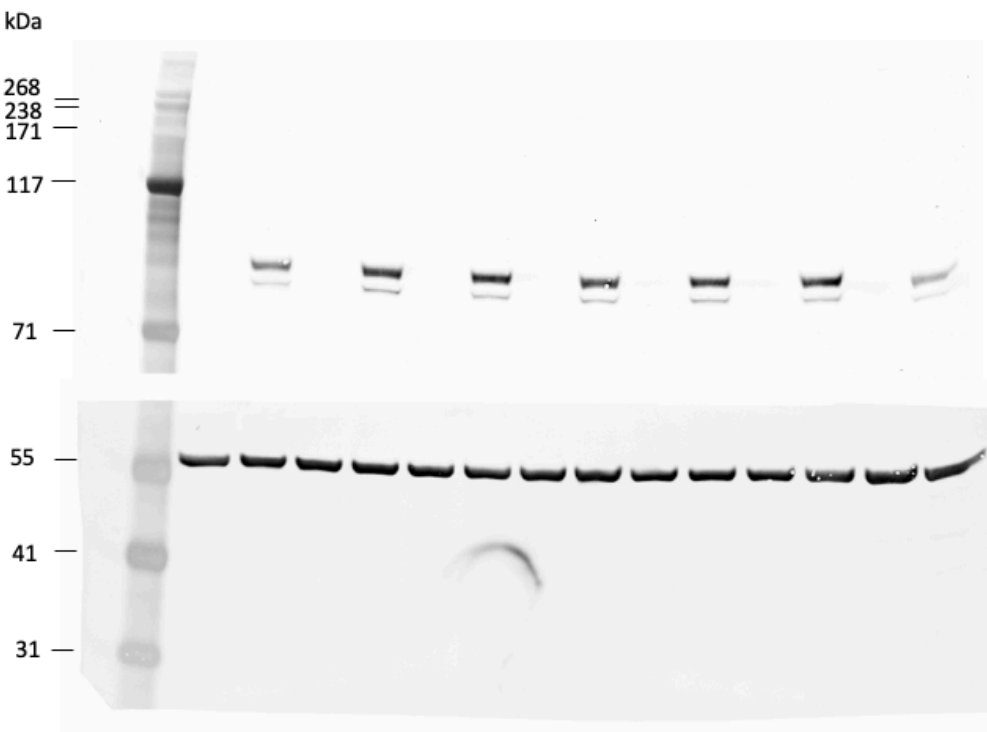

**Colorimetric ladder image:**

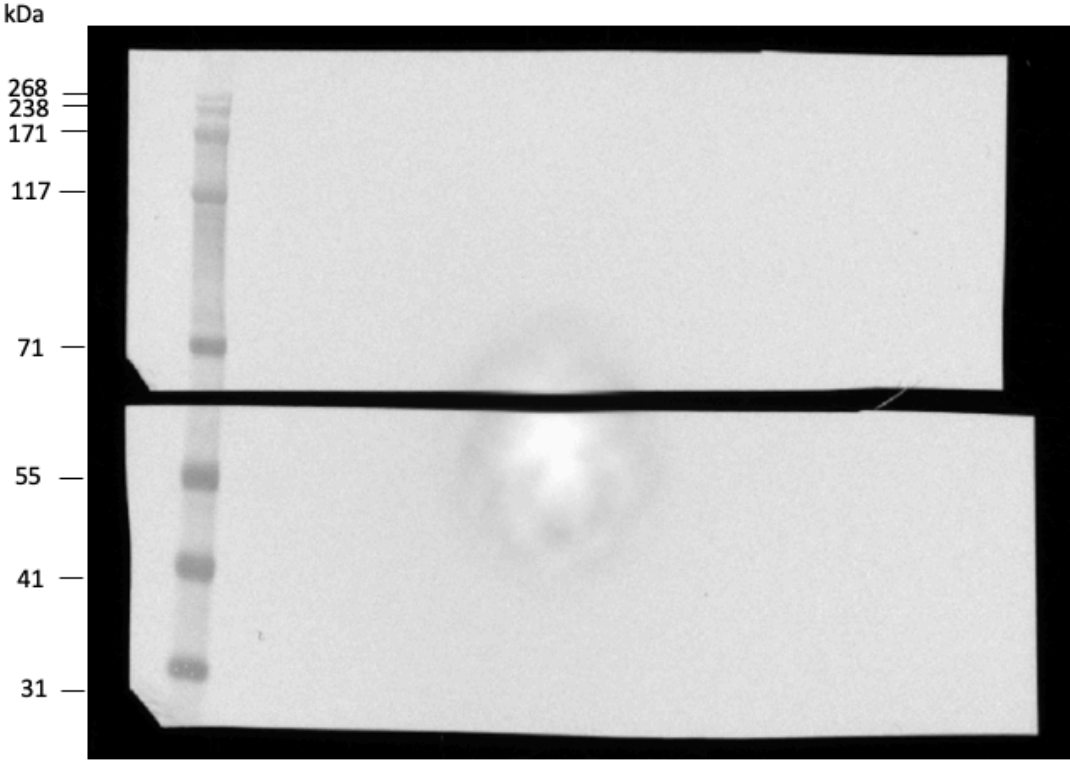

(b)

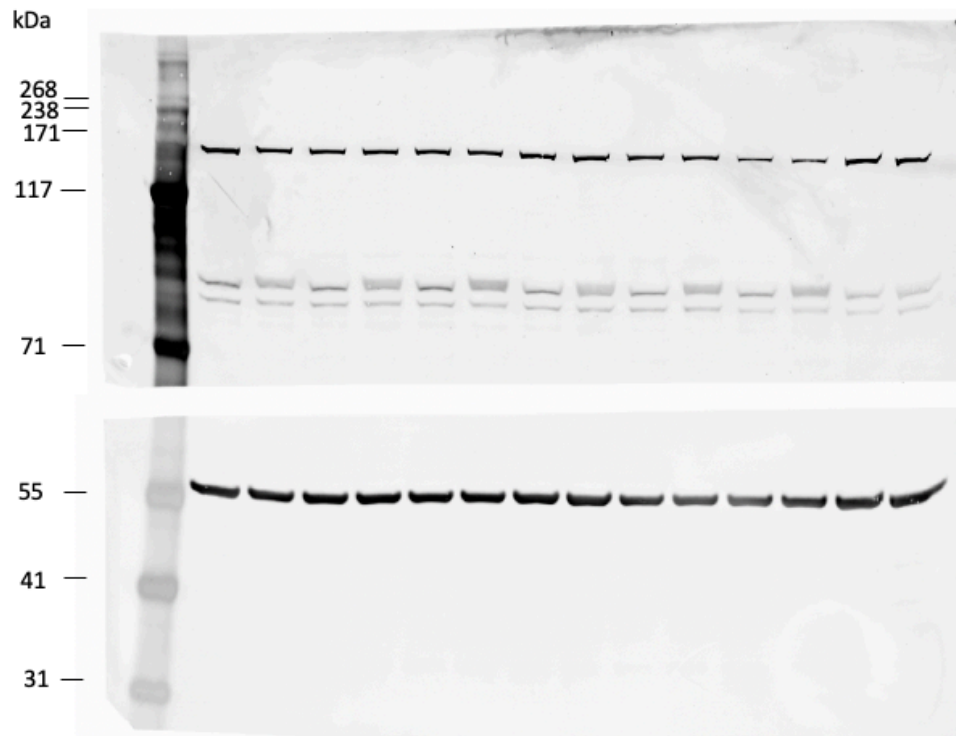

Colorimetric ladder image:

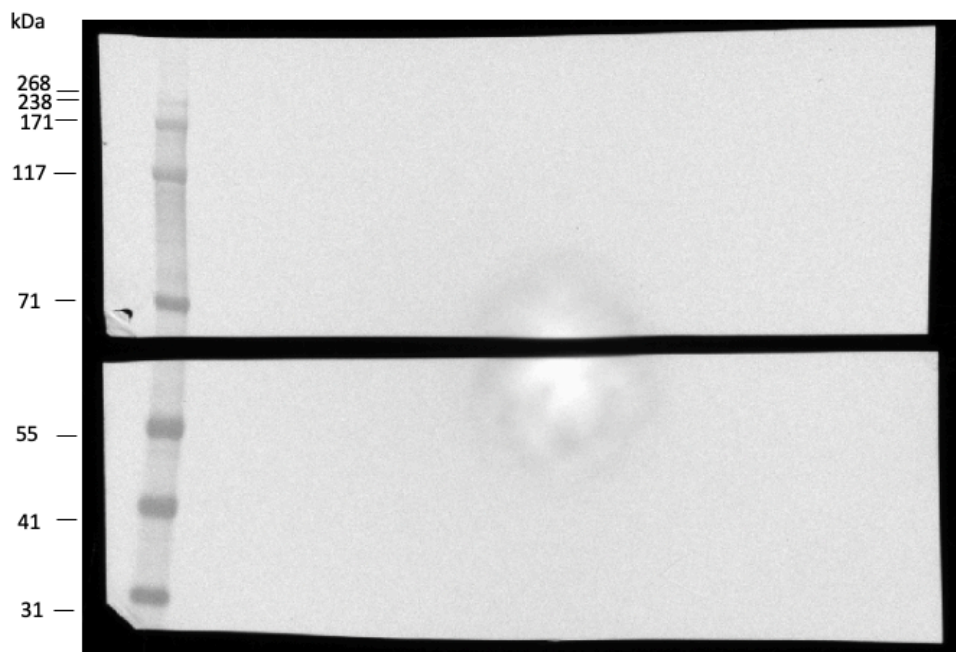



(c)  
0-30 minutes:

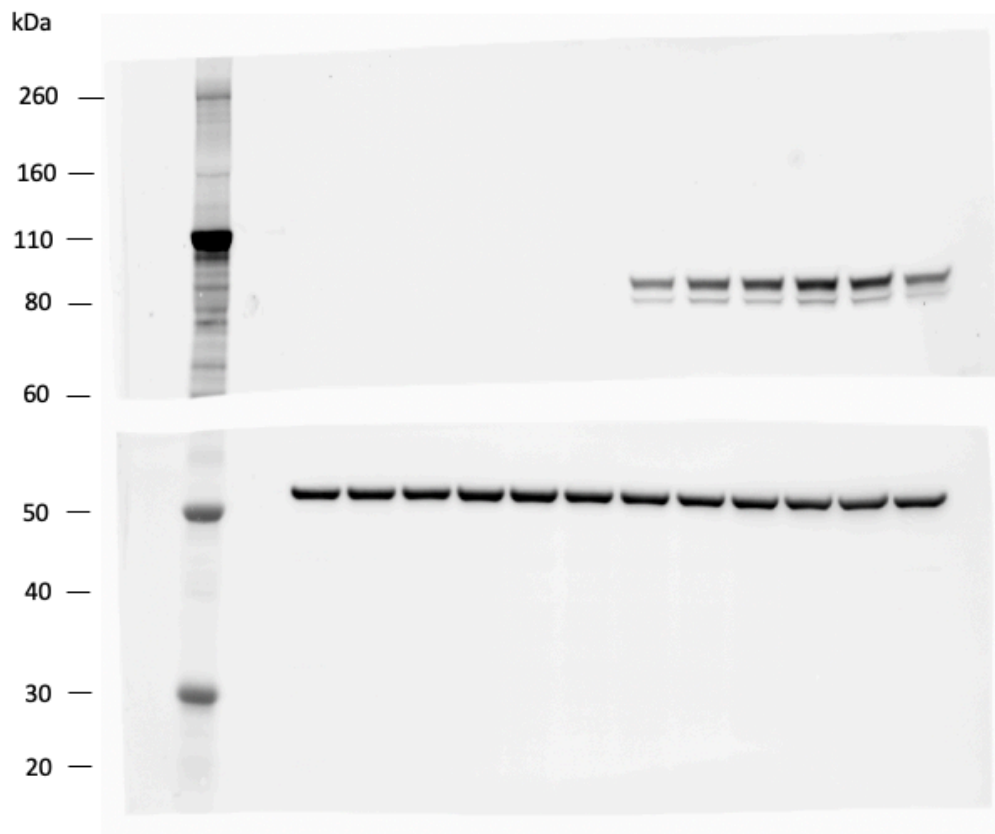

Colorimetric ladder image:

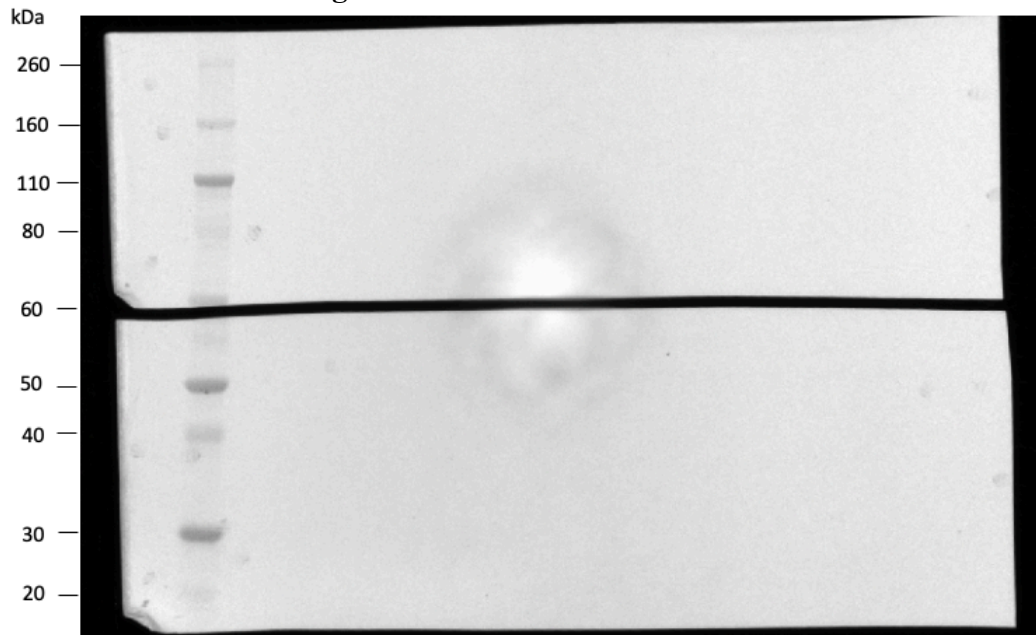

**60-120 minutes:**

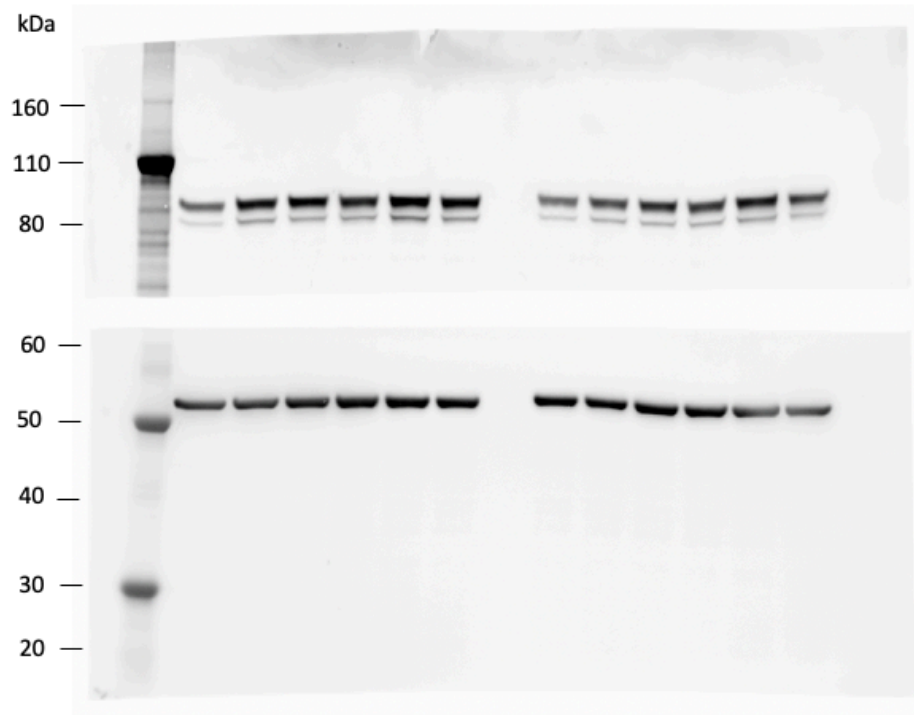

**Colorimetric ladder image:**

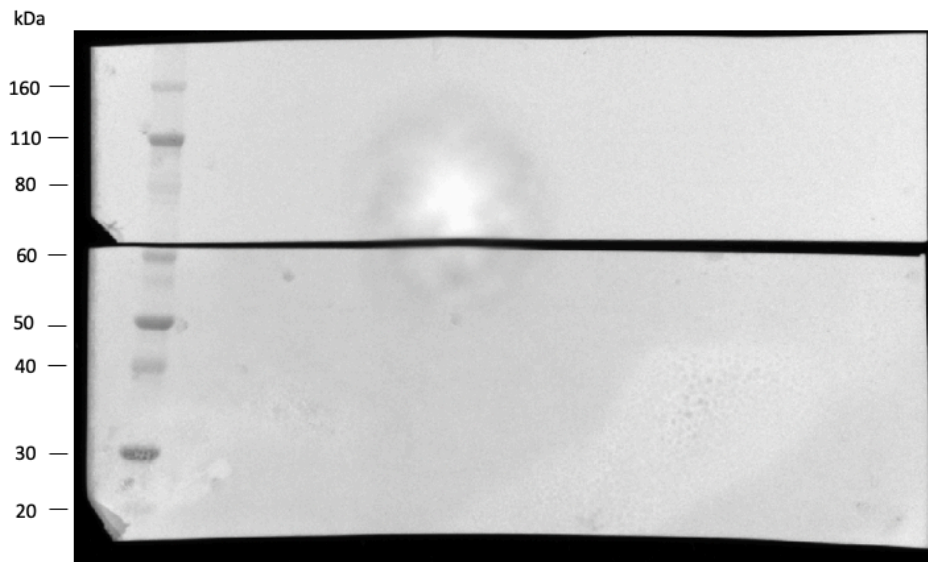

**(d)**

**0-30 minutes:**

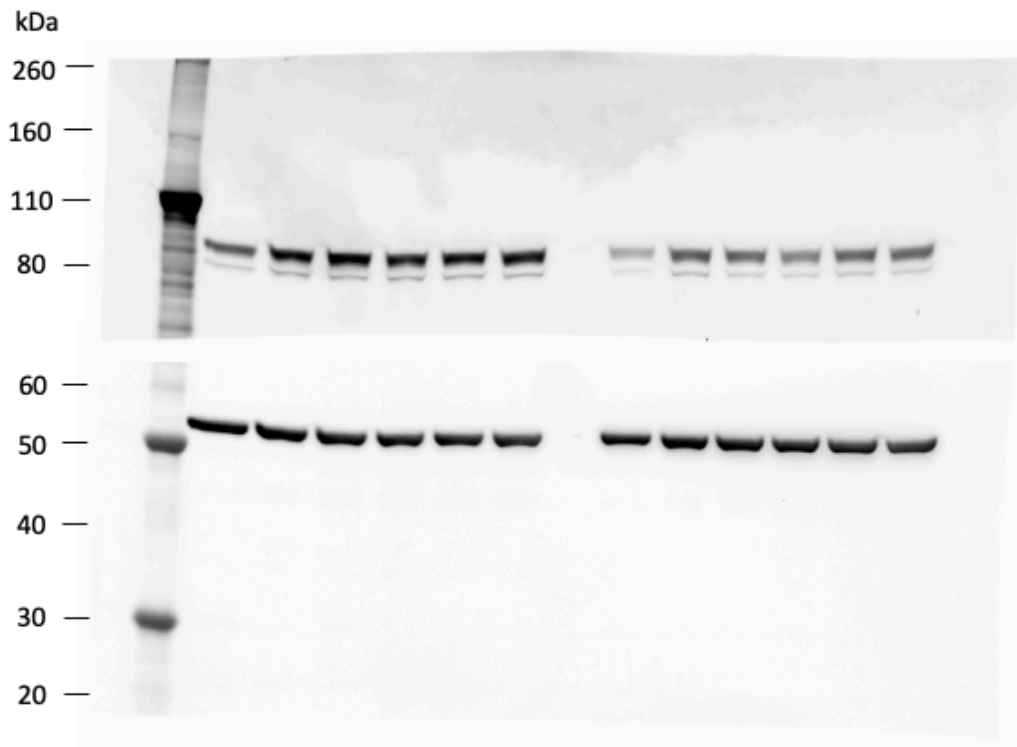

**Colorimetric ladder image:**

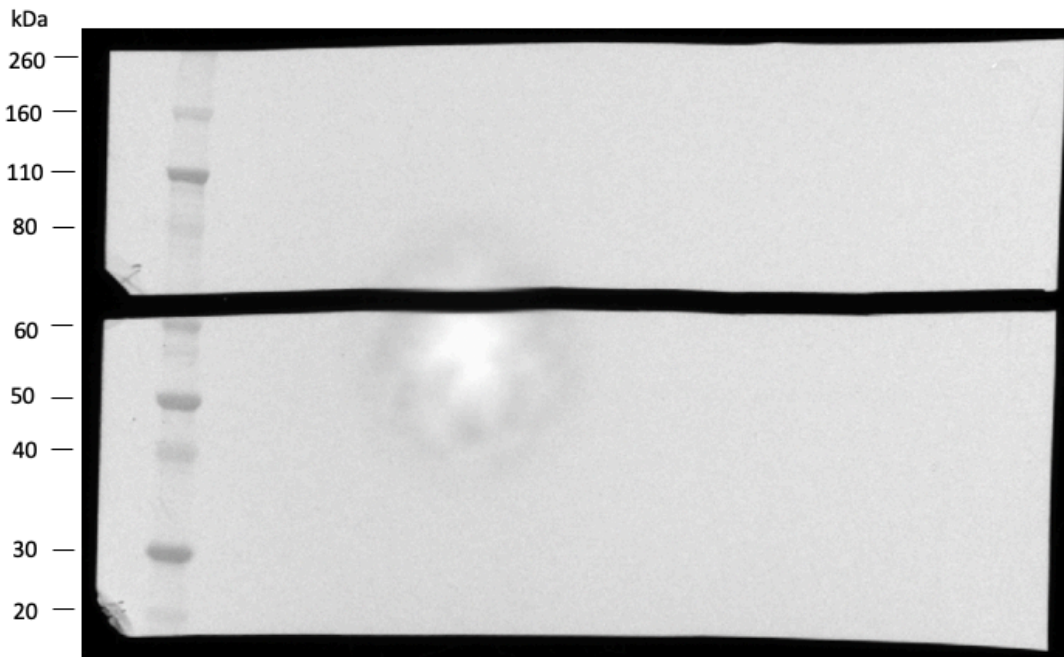

**60-120 minutes:**

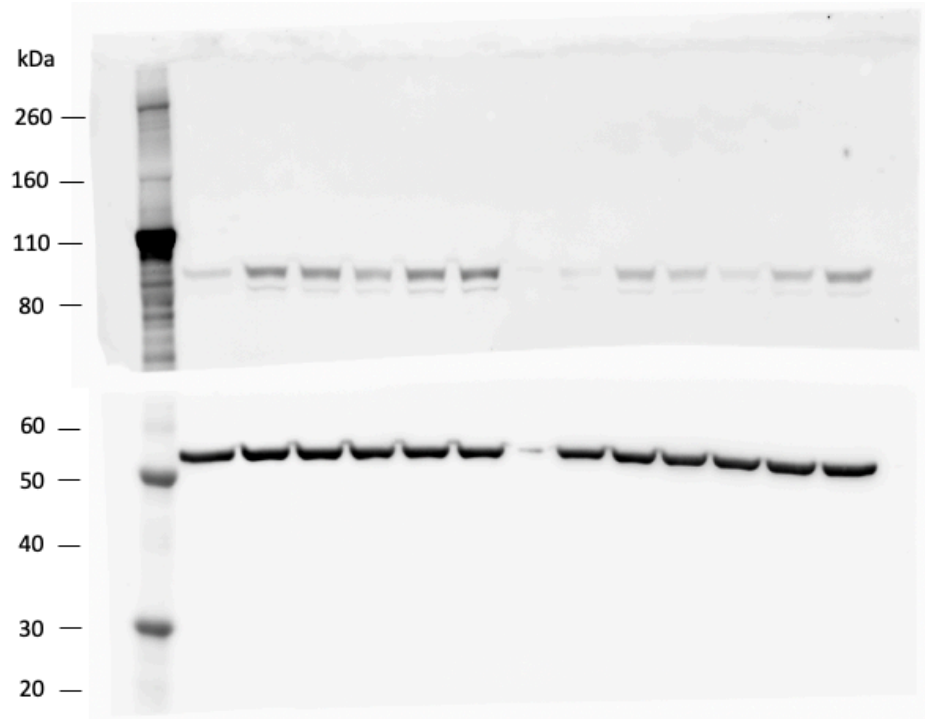

**Colorimetric ladder image:**

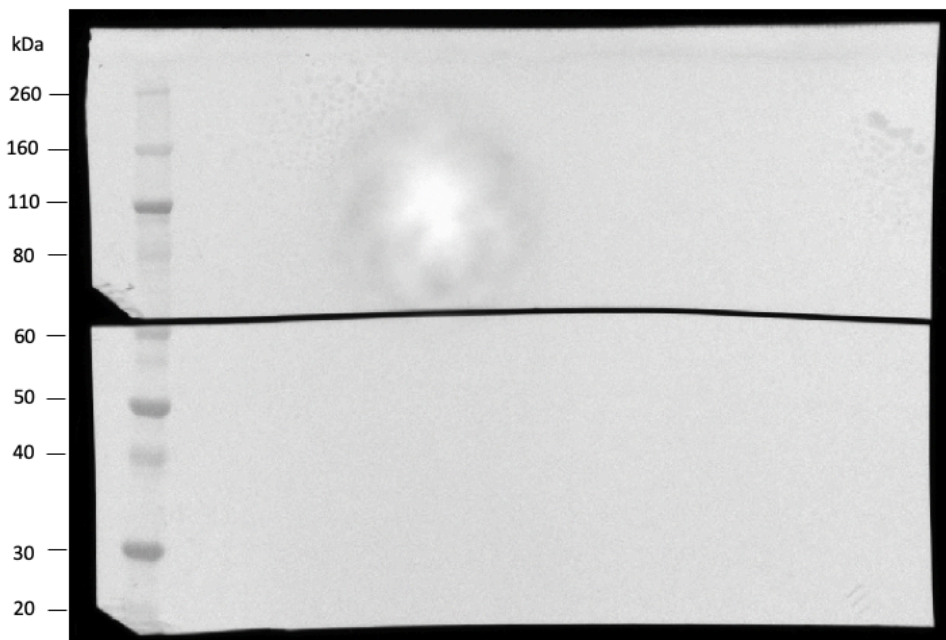

Supplementary Figure 4.

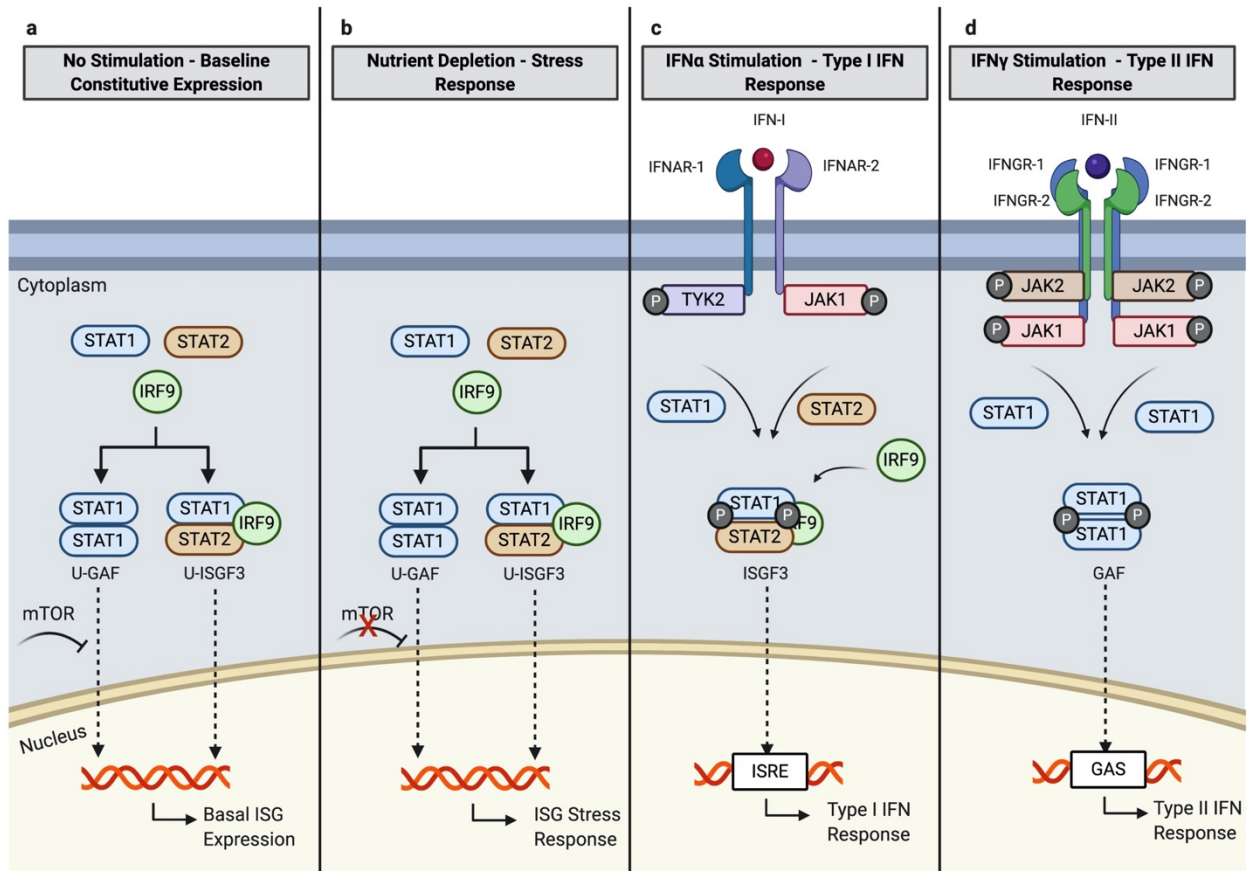

**Supplementary Table 1: pSTAT1/Tubulin following IFN $\gamma$  stimulation - densitometry analysis of immunoblots**

| <b>Genotype</b> | <b>Experiment</b> | <b>pSTAT1/Tubulin</b> | <b>pSTAT1/Tubulin - percentage of WT per each experiment</b> | <b>Mean (% of WT)</b> |
|-----------------|-------------------|-----------------------|--------------------------------------------------------------|-----------------------|
| WT              | 1                 | 1.659691759           | 100                                                          | 100                   |
| WT              | 2                 | 0.685576707           | 100                                                          |                       |
| WT              | 3                 | 0.19264795            | 100                                                          |                       |
| WT              | 4                 | 0.446300028           | 100                                                          |                       |
| WT              | 5                 | 0.572328025           | 100                                                          |                       |
| E235G           | 1                 | 2.631382444           | 158.5464548                                                  | 149.466837            |
| E235G           | 2                 | 0.919113296           | 134.0642537                                                  |                       |
| E235G           | 3                 | 0.2994283             | 155.4277115                                                  |                       |
| E235G           | 4                 | 0.67909645            | 152.1614178                                                  |                       |
| E235G           | 5                 | 0.842091116           | 147.1343494                                                  |                       |
| K278E           | 1                 | 3.472278943           | 209.2122784                                                  | 177.869135            |
| K278E           | 2                 | 1.115974038           | 162.7788731                                                  |                       |
| K278E           | 3                 | 0.358083084           | 185.8743288                                                  |                       |
| K278E           | 4                 | 0.852208894           | 190.9497737                                                  |                       |
| K278E           | 5                 | 0.804294992           | 140.5304226                                                  |                       |
| P329L           | 1                 | 3.013079363           | 181.5445155                                                  | 165.478582            |
| P329L           | 2                 | 0.829695249           | 121.021505                                                   |                       |
| P329L           | 3                 | 0.391353254           | 203.1442608                                                  |                       |
| P329L           | 4                 | 0.821830124           | 184.1429694                                                  |                       |
| P329L           | 5                 | 0.78717802            | 137.5396601                                                  |                       |
| T385M           | 1                 | 3.57198519            | 215.2197943                                                  | 171.189318            |
| T385M           | 2                 | 0.931353687           | 135.849669                                                   |                       |
| T385M           | 3                 | 0.328079882           | 170.3002196                                                  |                       |
| T385M           | 4                 | 0.725562602           | 162.5728336                                                  |                       |
| T385M           | 5                 | 0.984427519           | 172.0040739                                                  |                       |
| D517G           | 1                 | 3.332493409           | 200.7898991                                                  | 156.853892            |
| D517G           | 2                 | 1.129603874           | 164.7669564                                                  |                       |
| D517G           | 3                 | 0.270072566           | 140.1896911                                                  |                       |
| D517G           | 4                 | 0.509445939           | 114.1487579                                                  |                       |
| D517G           | 5                 | 0.940759359           | 164.3741557                                                  |                       |
| Y701C           | 1                 | 0.729638157           | 43.96226908                                                  | 58.2630681            |
| Y701C           | 2                 | 0.402104115           | 58.65195111                                                  |                       |
| Y701C           | 3                 | 0.139625945           | 72.47725449                                                  |                       |
| Y701C           | 4                 | 0.270690276           | 60.65208575                                                  |                       |

**Supplementary Table 2: STAT1/Tubulin following IFN $\gamma$  stimulation - densitometry analysis of immunoblots**

| <b>Genotype</b> | <b>Experiment</b> | <b>STAT1/Tubulin</b> | <b>STAT1/Tubulin - percentage of WT per each experiment</b> | <b>Mean (% of WT)</b> |
|-----------------|-------------------|----------------------|-------------------------------------------------------------|-----------------------|
| WT              | 1                 | 0.665257597          | 100                                                         | 100                   |
| WT              | 2                 | 0.206643538          | 100                                                         |                       |
| WT              | 3                 | 0.036689368          | 100                                                         |                       |
| WT              | 4                 | 0.091110442          | 100                                                         |                       |
| WT              | 5                 | 0.153267657          | 100                                                         |                       |
| E235G           | 1                 | 0.771844577          | 116.021911                                                  | 120.332413            |
| E235G           | 2                 | 0.204002359          | 98.72186713                                                 |                       |
| E235G           | 3                 | 0.054454786          | 148.4211637                                                 |                       |
| E235G           | 4                 | 0.105887354          | 116.2186819                                                 |                       |
| E235G           | 5                 | 0.1874133            | 122.2784398                                                 |                       |
| K278E           | 1                 | 0.602361233          | 90.54556252                                                 | 144.461651            |
| K278E           | 2                 | 0.267441414          | 129.4216196                                                 |                       |
| K278E           | 3                 | 0.065428504          | 178.3309662                                                 |                       |
| K278E           | 4                 | 0.133560361          | 146.591717                                                  |                       |
| K278E           | 5                 | 0.271925006          | 177.4183879                                                 |                       |
| P329L           | 1                 | 0.551294868          | 82.86938335                                                 | 167.684037            |
| P329L           | 2                 | 0.208465538          | 100.8817113                                                 |                       |
| P329L           | 3                 | 0.096005826          | 261.6720649                                                 |                       |
| P329L           | 4                 | 0.187726066          | 206.0423176                                                 |                       |
| P329L           | 5                 | 0.286541103          | 186.9547096                                                 |                       |
| T385M           | 1                 | 1.108843999          | 166.6788932                                                 | 177.111977            |
| T385M           | 2                 | 0.300709447          | 145.5208568                                                 |                       |
| T385M           | 3                 | 0.079580199          | 216.902619                                                  |                       |
| T385M           | 4                 | 0.15346647           | 168.440046                                                  |                       |
| T385M           | 5                 | 0.288169973          | 188.0174714                                                 |                       |
| D517G           | 1                 | 0.844711143          | 126.9750464                                                 | 165.024779            |
| D517G           | 2                 | 0.247791279          | 119.9124258                                                 |                       |
| D517G           | 3                 | 0.078875104          | 214.980821                                                  |                       |
| D517G           | 4                 | 0.145815606          | 160.0426951                                                 |                       |
| D517G           | 5                 | 0.311459657          | 203.2129045                                                 |                       |
| Y701C           | 1                 | 0.493416669          | 74.16926491                                                 | 109.682524            |
| Y701C           | 2                 | 0.11732849           | 56.77820418                                                 |                       |
| Y701C           | 3                 | 0.05849544           | 159.4343093                                                 |                       |
| Y701C           | 4                 | 0.118846143          | 130.4418473                                                 |                       |
| Y701C           | 5                 | 0.195552665          | 127.5889961                                                 |                       |

**Supplementary Table 3: pSTAT1/Tubulin time-course (0-120 minutes) following IFN $\gamma$  stimulation - densitometry analysis of immunoblots**

| Genotype | Time (minutes) | pSTAT1/Tubulin (Experiment 1) | pSTAT1/Tubulin (Experiment 2) |
|----------|----------------|-------------------------------|-------------------------------|
| WT       | 0              | 0                             | 0                             |
| E235G    | 0              | 0                             | 0                             |
| K278E    | 0              | 0                             | 0                             |
| P329L    | 0              | 0                             | 0                             |
| T385M    | 0              | 0                             | 0                             |
| D517G    | 0              | 0                             | 0                             |
| WT       | 30             | 0.515511699                   | 0.365437524                   |
| E235G    | 30             | 0.769238443                   | 0.628864556                   |
| K278E    | 30             | 0.877176913                   | 0.654588814                   |
| P329L    | 30             | 1.199901236                   | 0.892381925                   |
| T385M    | 30             | 1.076605795                   | 0.832291756                   |
| D517G    | 30             | 0.653600782                   | 0.521782828                   |
| WT       | 60             | 0.664165873                   | 0.408095512                   |
| E235G    | 60             | 1.152674563                   | 0.686435723                   |
| K278E    | 60             | 1.047935362                   | 0.77194422                    |
| P329L    | 60             | 0.843878989                   | 0.719382132                   |
| T385M    | 60             | 1.111218772                   | 1.019797628                   |
| D517G    | 60             | 1.031227634                   | 0.879318339                   |
| WT       | 120            | 0.487592092                   | 0.477744952                   |
| E235G    | 120            | 0.657126093                   | 0.709691529                   |
| K278E    | 120            | 0.657937344                   | 0.746896951                   |
| P329L    | 120            | 0.696400292                   | 0.830138398                   |
| T385M    | 120            | 1.239233963                   | 0.927537664                   |
| D517G    | 120            | 1.005181707                   | 0.690580674                   |



**Supplementary Table 4: pSTAT1/ de-phosphorylation assay: pSTAT1/Tubulin following IFN $\gamma$  stimulation at 0-120 minutes from Ruxolitinib administration - densitometry analysis of immunoblots**

| <b>Genotype</b> | <b>Time from Ruxolitinib (minutes)</b> | <b>pSTAT1/Tubulin (Experiment 1)</b> | <b>pSTAT1/Tubulin (Experiment 2)</b> |
|-----------------|----------------------------------------|--------------------------------------|--------------------------------------|
| WT              | 0                                      | 0.51393922                           | 0.482987702                          |
| E235G           | 0                                      | 0.852454001                          | 0.739001553                          |
| K278E           | 0                                      | 1.122602321                          | 0.880777682                          |
| P329L           | 0                                      | 0.964469579                          | 0.813779524                          |
| T385M           | 0                                      | 1.051368059                          | 0.658004216                          |
| D517G           | 0                                      | 1.135336917                          | 0.70739242                           |
| WT              | 30                                     | 0.285646355                          | 0.223482225                          |
| E235G           | 30                                     | 0.564083716                          | 0.507679867                          |
| K278E           | 30                                     | 0.528430857                          | 0.471385588                          |
| P329L           | 30                                     | 0.460668163                          | 0.379541217                          |
| T385M           | 30                                     | 0.609815591                          | 0.500929576                          |
| D517G           | 30                                     | 0.695440543                          | 0.420864395                          |
| WT              | 60                                     | 0.10986184                           | 0.151570576                          |
| E235G           | 60                                     | 0.337741246                          | 0.482463297                          |
| K278E           | 60                                     | 0.330810703                          | 0.47763585                           |
| P329L           | 60                                     | 0.218865505                          | 0.319542389                          |
| T385M           | 60                                     | 0.359097532                          | 0.487394595                          |
| D517G           | 60                                     | 0.449198663                          | 0.622756871                          |
| WT              | 120                                    | 0.050638687                          | 0.087074315                          |
| E235G           | 120                                    | 0.204347538                          | 0.257604925                          |
| K278E           | 120                                    | 0.143554476                          | 0.154179105                          |
| P329L           | 120                                    | 0.074117974                          | 0.082189422                          |
| T385M           | 120                                    | 0.159107162                          | 0.226439287                          |
| D517G           | 120                                    | 0.278682813                          | 0.348708894                          |

## Supplementary Table 5 (A-F): STAT1 nuclear fluorescence in unstimulated cells

(A) WILDTYPE:

|                                     | Area    | Mean          | Integrated Density | Raw     |
|-------------------------------------|---------|---------------|--------------------|---------|
| Background 1                        | 328.28  | 97.675        | 32064.776          | 985541  |
| Background 2                        | 400.118 | 100.038       | 40027.018          | 1230268 |
| Background 3                        | 236.368 | 94.083        | 22238.299          | 683515  |
| Background 4                        | 197.684 | 106.485       | 21050.308          | 647001  |
| Background 5                        | 261.03  | 90.124        | 23525.131          | 723067  |
| <b>Mean background fluorescence</b> |         | <b>97.681</b> |                    |         |

|                                    | Area    | Mean    | Integrated Density | Raw     | Corrected fluorescence |
|------------------------------------|---------|---------|--------------------|---------|------------------------|
| Nucleus 1                          | 97.606  | 601.083 | 58669.071          | 1803249 | 49134.81931            |
| Nucleus 2                          | 75.449  | 795.595 | 60026.928          | 1844984 | 52656.99423            |
| Nucleus 3                          | 102.909 | 672.407 | 69196.649          | 2126824 | 59144.39497            |
| Nucleus 4                          | 83.941  | 639.679 | 53695.219          | 1650373 | 45495.77818            |
| Nucleus 5                          | 98.614  | 741.804 | 73152.377          | 2248407 | 63519.66287            |
| Nucleus 6                          | 130.564 | 730.27  | 95346.786          | 2930573 | 82593.16392            |
| Nucleus 7                          | 132.548 | 797.332 | 105685.074         | 3248330 | 92737.65281            |
| Nucleus 8                          | 91.879  | 748.003 | 68726.06           | 2112360 | 59751.2274             |
| Nucleus 9                          | 96.207  | 729.955 | 70226.486          | 2158477 | 60828.89003            |
| Nucleus 10                         | 95.1    | 672.464 | 63951.617          | 1965613 | 54662.1539             |
| <b>Mean corrected fluorescence</b> |         |         |                    |         | <b>62052.47376</b>     |

**(B) E235G:**

|                                     | Area    | Mean           | Integrated Density | Raw     |
|-------------------------------------|---------|----------------|--------------------|---------|
| Background 1                        | 189.387 | 86.041         | 16294.996          | 500842  |
| Background 2                        | 639.414 | 101.193        | 64704.091          | 1988741 |
| Background 3                        | 189.745 | 92.121         | 17479.505          | 537249  |
| Background 4                        | 426.179 | 78.146         | 33304.204          | 1023636 |
| Background 5                        | 563.868 | 99.268         | 55973.822          | 1720408 |
| <b>Mean background fluorescence</b> |         | <b>91.3538</b> |                    |         |

|                                    | Area    | Mean    | Integrated Density | Raw     | Corrected fluorescence |
|------------------------------------|---------|---------|--------------------|---------|------------------------|
| Nucleus 1                          | 135.574 | 531.659 | 72079.203          | 2215422 | 59694.00292            |
| Nucleus 2                          | 124.512 | 481.834 | 59994.165          | 1843977 | 48619.52065            |
| Nucleus 3                          | 106.358 | 555.576 | 59089.686          | 1816177 | 49373.47854            |
| Nucleus 4                          | 89.537  | 549.42  | 49193.356          | 1512004 | 41013.81081            |
| Nucleus 5                          | 97.736  | 523.395 | 51154.448          | 1572280 | 42225.893              |
| Nucleus 6                          | 107.073 | 473.59  | 50708.846          | 1558584 | 40927.32057            |
| Nucleus 7                          | 90.09   | 535.981 | 48286.535          | 1484132 | 40056.47116            |
| Nucleus 8                          | 106.293 | 527.172 | 56034.403          | 1722270 | 46324.13354            |
| Nucleus 9                          | 103.787 | 489.559 | 50810.03           | 1561694 | 41328.69316            |
| Nucleus 10                         | 127.505 | 574.368 | 73235.114          | 2250950 | 61587.04773            |
| <b>Mean corrected fluorescence</b> |         |         |                    |         | <b>47115.03721</b>     |

(C) K278E:

|                                     | Area    | Mean           | Integrated Density | Raw    |
|-------------------------------------|---------|----------------|--------------------|--------|
| Background 1                        | 160.431 | 57.055         | 9153.324           | 281336 |
| Background 2                        | 115.24  | 77.621         | 8945.001           | 274933 |
| Background 3                        | 184.312 | 69.377         | 12787.083          | 393023 |
| Background 4                        | 172.014 | 59.1           | 10165.982          | 312461 |
| Background 5                        | 150.573 | 71.836         | 10816.556          | 332457 |
| <b>Mean background fluorescence</b> |         | <b>66.9978</b> |                    |        |

|                                    | Area    | Mean    | Integrated Density | Raw     | Corrected fluorescence |
|------------------------------------|---------|---------|--------------------|---------|------------------------|
| Nucleus 1                          | 88.138  | 818.366 | 72129.014          | 2216953 | 66223.9619             |
| Nucleus 2                          | 107.626 | 738.963 | 79531.944          | 2444489 | 72321.23878            |
| Nucleus 3                          | 82.151  | 594.059 | 48802.738          | 1499998 | 43298.80173            |
| Nucleus 4                          | 85.112  | 895.282 | 76199.363          | 2342059 | 70497.04625            |
| Nucleus 5                          | 120.575 | 940.762 | 113432.812         | 3486464 | 105354.5523            |
| Nucleus 6                          | 61.524  | 491.983 | 30268.768          | 930339  | 26146.79535            |
| Nucleus 7                          | 99.753  | 554.702 | 55333.107          | 1700715 | 48649.87546            |
| Nucleus 8                          | 73.367  | 843.867 | 61911.855          | 1902919 | 56996.42741            |
| Nucleus 9                          | 79.451  | 542.695 | 43117.602          | 1325260 | 37794.55979            |
| Nucleus 10                         | 99.07   | 664.006 | 65782.861          | 2021898 | 59145.38895            |
| <b>Mean corrected fluorescence</b> |         |         |                    |         | <b>58642.86479</b>     |

**(D) P329L:**

|                                     | Area    | Mean    | Integrated Density | Raw             |
|-------------------------------------|---------|---------|--------------------|-----------------|
| Background 1                        | 241.737 | 266.806 | 64496.874          | 1982372         |
| Background 2                        | 147.872 | 202.049 | 29877.532          | 918314          |
| Background 3                        | 143.155 | 240.452 | 34421.919          | 1057990         |
| Background 4                        | 116.671 | 226.139 | 26383.967          | 810936          |
| Background 5                        | 178.781 | 281.595 | 50343.768          | 1547363         |
| <b>Mean background fluorescence</b> |         |         |                    | <b>243.4082</b> |

|                                    | Area    | Mean     | Integrated Density | Raw     | Corrected fluorescence |
|------------------------------------|---------|----------|--------------------|---------|------------------------|
| Nucleus 1                          | 98.712  | 1323.731 | 130667.847         | 4016199 | 106640.5368            |
| Nucleus 2                          | 78.768  | 922.898  | 72694.541          | 2234335 | 53521.7639             |
| Nucleus 3                          | 70.894  | 1435.576 | 101774.05          | 3128121 | 84517.86907            |
| Nucleus 4                          | 94.124  | 1257.722 | 118382.229         | 3638589 | 95471.67558            |
| Nucleus 5                          | 96.727  | 1294.547 | 125217.843         | 3848688 | 101673.698             |
| Nucleus 6                          | 129.392 | 943.56   | 122089.616         | 3752539 | 90594.54219            |
| Nucleus 7                          | 87.097  | 1323.716 | 115291.32          | 3543587 | 94091.196              |
| Nucleus 8                          | 95.1    | 1326.248 | 126126.746         | 3876624 | 102978.6262            |
| Nucleus 9                          | 81.208  | 1417.978 | 115150.996         | 3539274 | 95384.30289            |
| Nucleus 10                         | 95.816  | 1289.811 | 123584.738         | 3798493 | 100262.3379            |
| <b>Mean corrected fluorescence</b> |         |          |                    |         | <b>92513.65485</b>     |

**(E) T385M:**

|                                     | Area    | Mean   | Integrated Density | Raw            |
|-------------------------------------|---------|--------|--------------------|----------------|
| Background 1                        | 152.362 | 82.071 | 12504.547          | 384339         |
| Background 2                        | 126.562 | 86.109 | 10898.122          | 334964         |
| Background 3                        | 134.468 | 67.239 | 9041.533           | 277900         |
| Background 4                        | 154.152 | 86.394 | 13317.765          | 409334         |
| Background 5                        | 100.924 | 72.836 | 7350.939           | 225938         |
| <b>Mean background fluorescence</b> |         |        |                    | <b>78.9298</b> |

|                                    | Area    | Mean     | Integrated Density | Raw     | Corrected fluorescence |
|------------------------------------|---------|----------|--------------------|---------|------------------------|
| Nucleus 1                          | 119.274 | 940.767  | 112209.13          | 3448853 | 102794.857             |
| Nucleus 2                          | 90.903  | 759.855  | 69073.406          | 2123036 | 61898.45039            |
| Nucleus 3                          | 81.208  | 1008.184 | 81872.494          | 2516428 | 75462.7628             |
| Nucleus 4                          | 69.365  | 909.572  | 63092.492          | 1939207 | 57617.52642            |
| Nucleus 5                          | 75.286  | 1132.812 | 85285.404          | 2621327 | 79343.09508            |
| Nucleus 6                          | 96.402  | 1078.935 | 104011.235         | 3196883 | 96402.24442            |
| Nucleus 7                          | 71.285  | 1140.888 | 81327.79           | 2499686 | 75701.27921            |
| Nucleus 8                          | 82.477  | 1136.813 | 93760.597          | 2881820 | 87250.70389            |
| Nucleus 9                          | 107.529 | 951.545  | 102318.526         | 3144856 | 93831.28354            |
| Nucleus 10                         | 121.356 | 861.123  | 104502.745         | 3211990 | 94924.14019            |
| <b>Mean corrected fluorescence</b> |         |          |                    |         | <b>82522.6343</b>      |

**(F) D517G:**

|                                     | Area    | Mean   | Integrated Density | Raw            |
|-------------------------------------|---------|--------|--------------------|----------------|
| Background 1                        | 345.036 | 28.344 | 9779.854           | 300593         |
| Background 2                        | 161.505 | 32.509 | 5250.336           | 161374         |
| Background 3                        | 376.172 | 25.517 | 9598.958           | 295033         |
| Background 4                        | 397.515 | 29.72  | 11814.313          | 363124         |
| Background 5                        | 258.004 | 24.879 | 6418.935           | 197292         |
| <b>Mean background fluorescence</b> |         |        |                    | <b>28.1938</b> |

|                                    | Area    | Mean    | Integrated Density | Raw     | Corrected fluorescence |
|------------------------------------|---------|---------|--------------------|---------|------------------------|
| Nucleus 1                          | 146.831 | 479.636 | 70425.634          | 2164598 | 66285.91015            |
| Nucleus 2                          | 103.82  | 564.998 | 58657.977          | 1802908 | 55730.89668            |
| Nucleus 3                          | 152.623 | 568.343 | 86741.94           | 2666095 | 82438.91766            |
| Nucleus 4                          | 101.119 | 345.439 | 34930.542          | 1073623 | 32079.61314            |
| Nucleus 5                          | 127.408 | 362.174 | 46143.832          | 1418274 | 42551.71633            |
| Nucleus 6                          | 116.118 | 491.908 | 57119.484          | 1755621 | 53845.67633            |
| Nucleus 7                          | 97.541  | 474.978 | 46329.64           | 1423985 | 43579.58855            |
| Nucleus 8                          | 94.482  | 548.903 | 51861.601          | 1594015 | 49197.79439            |
| Nucleus 9                          | 89.114  | 505.134 | 45014.437          | 1383561 | 42501.97471            |
| Nucleus 10                         | 127.408 | 550.085 | 70085.153          | 2154133 | 66493.03733            |
| <b>Mean corrected fluorescence</b> |         |         |                    |         | <b>53470.51253</b>     |

**Supplementary Table 6 (A-F): STAT1 nuclear fluorescence in cells after 60 minutes of IFN $\gamma$  stimulation:**

**(A) WILDTYPE:**

|                                     | Area    | Mean           | Integrated Density | Raw    |
|-------------------------------------|---------|----------------|--------------------|--------|
| Background 1                        | 122.072 | 67.949         | 8294.622           | 254943 |
| Background 2                        | 219.873 | 74.938         | 16476.803          | 506430 |
| Background 3                        | 147.677 | 73.422         | 10842.747          | 333262 |
| Background 4                        | 176.471 | 69.872         | 12330.451          | 378988 |
| Background 5                        | 85.145  | 84.651         | 7207.556           | 221531 |
| <b>Mean background fluorescence</b> |         | <b>74.1664</b> |                    |        |

|                                    | Area    | Mean    | Integrated Density | Raw     | Corrected fluorescence |
|------------------------------------|---------|---------|--------------------|---------|------------------------|
| Nucleus 1                          | 102.128 | 919.442 | 93900.824          | 2886130 | 86326.3579             |
| Nucleus 2                          | 111.758 | 829.193 | 92669.301          | 2848278 | 84380.61247            |
| Nucleus 3                          | 77.954  | 732.312 | 57086.917          | 1754620 | 51305.34945            |
| Nucleus 4                          | 109.546 | 875.059 | 95859.182          | 2946322 | 87734.54955            |
| Nucleus 5                          | 79.679  | 754.144 | 60089.2            | 1846898 | 54179.69541            |
| Nucleus 6                          | 92.855  | 909.266 | 84430.314          | 2595045 | 77543.59293            |
| Nucleus 7                          | 90.773  | 917.715 | 83303.913          | 2560424 | 76571.60637            |
| Nucleus 8                          | 88.723  | 999.174 | 88650.227          | 2724748 | 82069.96149            |
| Nucleus 9                          | 108.928 | 815.788 | 88862.032          | 2731258 | 80783.23438            |
| Nucleus 10                         | 82.444  | 1258.94 | 103792.273         | 3190153 | 97677.69832            |
| <b>Mean corrected fluorescence</b> |         |         |                    |         | <b>77857.26583</b>     |



(B) E235G:

|                                     | Area   | Mean            | Integrated Density | Raw    |
|-------------------------------------|--------|-----------------|--------------------|--------|
| Background 1                        | 82.347 | 127.565         | 10504.576          | 322868 |
| Background 2                        | 65.884 | 123.586         | 8142.325           | 250262 |
| Background 3                        | 40.962 | 121.589         | 4980.521           | 153081 |
| Background 4                        | 80.232 | 122.873         | 9858.329           | 303005 |
| Background 5                        | 92.628 | 120.275         | 11140.802          | 342423 |
| <b>Mean background fluorescence</b> |        | <b>123.1776</b> |                    |        |

|                                    | Area    | Mean     | Integrated Density | Raw     | Corrected fluorescence |
|------------------------------------|---------|----------|--------------------|---------|------------------------|
| Nucleus 1                          | 119.079 | 2274.955 | 270899.059         | 8326337 | 256231.1936            |
| Nucleus 2                          | 172.079 | 1319.258 | 227016.164         | 6977555 | 205819.8858            |
| Nucleus 3                          | 140.097 | 1424.532 | 199572.005         | 6134033 | 182315.1928            |
| Nucleus 4                          | 177.61  | 1453.177 | 258098.311         | 7932894 | 236220.7375            |
| Nucleus 5                          | 106.878 | 1779.634 | 190203.981         | 5846098 | 177039.0055            |
| Nucleus 6                          | 103.364 | 2008.876 | 207646.168         | 6382200 | 194914.0386            |
| Nucleus 7                          | 131.149 | 1791.95  | 235013.121         | 7223349 | 218858.5019            |
| Nucleus 8                          | 141.756 | 1428.319 | 202472.681         | 6223188 | 185011.5171            |
| Nucleus 9                          | 116.834 | 1622.67  | 189582.852         | 5827007 | 175191.5203            |
| Nucleus 10                         | 118.786 | 1556.875 | 184934.97          | 5684150 | 184934.97              |
| <b>Mean corrected fluorescence</b> |         |          |                    |         | <b>201653.6563</b>     |

(C) K278E:

|                                     | Area    | Mean           | Integrated Density | Raw    |
|-------------------------------------|---------|----------------|--------------------|--------|
| Background 1                        | 92.855  | 98.617         | 9157.163           | 281454 |
| Background 2                        | 57.36   | 93.42          | 5358.515           | 164699 |
| Background 3                        | 94.58   | 93.384         | 8832.201           | 271466 |
| Background 4                        | 93.701  | 97.519         | 9137.707           | 280856 |
| Background 5                        | 144.717 | 94.227         | 13636.187          | 419121 |
| <b>Mean background fluorescence</b> |         | <b>95.4334</b> |                    |        |

|                                    | Area    | Mean     | Integrated Density | Raw     | Corrected fluorescence |
|------------------------------------|---------|----------|--------------------|---------|------------------------|
| Nucleus 1                          | 104.601 | 2420.746 | 253211.654         | 7782698 | 243229.2249            |
| Nucleus 2                          | 94.092  | 2740.624 | 257870.305         | 7925886 | 248890.7855            |
| Nucleus 3                          | 121.519 | 2269.623 | 275802.309         | 8477043 | 264205.3377            |
| Nucleus 4                          | 108.049 | 1746.185 | 188674.274         | 5799081 | 178362.7906            |
| Nucleus 5                          | 84.592  | 2505.983 | 211984.965         | 6515557 | 203912.0628            |
| Nucleus 6                          | 118.656 | 1615.942 | 191741.009         | 5893340 | 180417.2635            |
| Nucleus 7                          | 140.129 | 1772.247 | 248343.347         | 7633066 | 234970.3601            |
| Nucleus 8                          | 113.45  | 1742.892 | 197731.553         | 6077465 | 186904.6338            |
| Nucleus 9                          | 118.558 | 2615.325 | 310068.417         | 9530244 | 298754.024             |
| Nucleus 10                         | 122.528 | 2324.865 | 284860.044         | 8755441 | 273166.7804            |
| <b>Mean corrected fluorescence</b> |         |          |                    |         | <b>231281.3263</b>     |

(D) P329L:

|                                     | Area    | Mean            | Integrated Density | Raw    |
|-------------------------------------|---------|-----------------|--------------------|--------|
| Background 1                        | 110.359 | 126.21          | 13928.418          | 428103 |
| Background 2                        | 44.183  | 123.37          | 5450.818           | 167536 |
| Background 3                        | 62.825  | 138.685         | 8712.96            | 267801 |
| Background 4                        | 48.64   | 125.726         | 6115.349           | 187961 |
| Background 5                        | 69.658  | 124.713         | 8687.224           | 267010 |
| <b>Mean background fluorescence</b> |         | <b>127.7408</b> |                    |        |

|                                    | Area    | Mean     | Integrated Density | Raw     | Corrected fluorescence |
|------------------------------------|---------|----------|--------------------|---------|------------------------|
| Nucleus 1                          | 99.981  | 1118.401 | 111818.447         | 3436845 | 99046.79408            |
| Nucleus 2                          | 80.004  | 1545.71  | 123663.116         | 3800902 | 113443.341             |
| Nucleus 3                          | 87.552  | 965.445  | 84526.846          | 2598012 | 73342.88348            |
| Nucleus 4                          | 95.523  | 1098.764 | 104957.587         | 3225970 | 92755.40256            |
| Nucleus 5                          | 91.684  | 1216.145 | 111501.294         | 3427097 | 99789.50649            |
| Nucleus 6                          | 100.469 | 957.172  | 96165.859          | 2955748 | 83331.86856            |
| Nucleus 7                          | 95.133  | 1024.743 | 97486.821          | 2996349 | 85334.45547            |
| Nucleus 8                          | 105.479 | 1118.768 | 118006.708         | 3627047 | 104532.7362            |
| Nucleus 9                          | 75.221  | 1376.033 | 103507.102         | 3181388 | 93898.31128            |
| Nucleus 10                         | 82.249  | 1544.468 | 127030.899         | 3904414 | 116524.3459            |
| <b>Mean corrected fluorescence</b> |         |          |                    |         | <b>96199.96451</b>     |

(E) T385M:

|                                     | Area    | Mean           | Integrated Density | Raw    |
|-------------------------------------|---------|----------------|--------------------|--------|
| Background 1                        | 89.504  | 74.581         | 6675.28            | 205171 |
| Background 2                        | 54.106  | 77.026         | 4167.564           | 128094 |
| Background 3                        | 121.031 | 64.992         | 7866.101           | 241772 |
| Background 4                        | 110.62  | 63.829         | 7060.79            | 217020 |
| Background 5                        | 110.652 | 76.443         | 8458.534           | 259981 |
| <b>Mean background fluorescence</b> |         | <b>71.3742</b> |                    |        |

|                                    | Area    | Mean     | Integrated Density | Raw     | Corrected fluorescence |
|------------------------------------|---------|----------|--------------------|---------|------------------------|
| Nucleus 1                          | 125.521 | 1669.304 | 209532.429         | 6440176 | 200573.468             |
| Nucleus 2                          | 103.104 | 1689.392 | 174183.127         | 5353682 | 166824.1615            |
| Nucleus 3                          | 119.079 | 1404.208 | 167211.451         | 5139401 | 158712.2826            |
| Nucleus 4                          | 86.381  | 1523.65  | 131614.394         | 4045292 | 125449.0192            |
| Nucleus 5                          | 87.813  | 1546.704 | 135819.927         | 4174553 | 129552.3444            |
| Nucleus 6                          | 124.805 | 1696.648 | 211750.159         | 6508340 | 202842.302             |
| Nucleus 7                          | 88.17   | 1531.635 | 135044.873         | 4150731 | 128751.8098            |
| Nucleus 8                          | 79.776  | 1546.96  | 123410.74          | 3793145 | 117716.7918            |
| Nucleus 9                          | 77.629  | 1460.112 | 113347.049         | 3483828 | 107806.3412            |
| Nucleus 10                         | 106.423 | 1197.341 | 127424.25          | 3916504 | 119828.3935            |
| <b>Mean corrected fluorescence</b> |         |          |                    |         | <b>145805.6914</b>     |

(F) D517G:

|                                     | Area    | Mean           | Integrated Density | Raw    |
|-------------------------------------|---------|----------------|--------------------|--------|
| Background 1                        | 109.481 | 39.995         | 4378.685           | 134583 |
| Background 2                        | 103.397 | 42.029         | 4345.662           | 133568 |
| Background 3                        | 182.23  | 39.615         | 7219.008           | 221883 |
| Background 4                        | 102.128 | 39.176         | 4000.984           | 122974 |
| Background 5                        | 109.091 | 36.619         | 3994.835           | 122785 |
| <b>Mean background fluorescence</b> |         | <b>39.4868</b> |                    |        |

|                                    | Area    | Mean     | Integrated Density | Raw     | Corrected fluorescence |
|------------------------------------|---------|----------|--------------------|---------|------------------------|
| Nucleus 1                          | 110.717 | 1266.694 | 140244.974         | 4310561 | 135873.114             |
| Nucleus 2                          | 64.159  | 1238.4   | 79454.998          | 2442124 | 76921.5644             |
| Nucleus 3                          | 71.382  | 1135.147 | 81029.344          | 2490513 | 78210.69724            |
| Nucleus 4                          | 106.911 | 1291.526 | 138077.87          | 4243953 | 133856.2967            |
| Nucleus 5                          | 76.197  | 1087.705 | 82880.37           | 2547406 | 79871.5943             |
| Nucleus 6                          | 68.91   | 1119.283 | 77129.317          | 2370642 | 74408.28161            |
| Nucleus 7                          | 81.013  | 876.622  | 71017.514          | 2182790 | 67818.56987            |
| Nucleus 8                          | 93.864  | 1023.506 | 96070.433          | 2952815 | 92364.044              |
| Nucleus 9                          | 69.007  | 1106.927 | 76385.92           | 2347793 | 73661.05439            |
| Nucleus 10                         | 81.859  | 1132.661 | 92717.974          | 2849774 | 89485.62404            |
| <b>Mean corrected fluorescence</b> |         |          |                    |         | <b>90247.08406</b>     |
