# Supplementary material for: STAT1 gain-of-function heterozygous cell models reveal diverse interferon-signature gene transcriptional responses
Source: PubMed Central journal article supplement (PMC8121859; doi:10.1038/s41525-021-00196-7), 2021-05-14
Supplement: 41525_2021_196_MOESM2_ESM.pdf [file 41525_2021_196_MOESM2_ESM.pdf]

## Reporting Summary

Nature Research wishes to improve the reproducibility of the work that we publish. This form provides structure for consistency and transparency in reporting. For further information on Nature Research policies, see our [Editorial Policies](#) and the [Editorial Policy Checklist](#).

### Statistics

For all statistical analyses, confirm that the following items are present in the figure legend, table legend, main text, or Methods section.

n/a Confirmed

- |                                     |                                     |                                                                                                                                                                                                                                                            |
|-------------------------------------|-------------------------------------|------------------------------------------------------------------------------------------------------------------------------------------------------------------------------------------------------------------------------------------------------------|
| <input type="checkbox"/>            | <input checked="" type="checkbox"/> | The exact sample size ( $n$ ) for each experimental group/condition, given as a discrete number and unit of measurement                                                                                                                                    |
| <input type="checkbox"/>            | <input checked="" type="checkbox"/> | A statement on whether measurements were taken from distinct samples or whether the same sample was measured repeatedly                                                                                                                                    |
| <input type="checkbox"/>            | <input checked="" type="checkbox"/> | The statistical test(s) used AND whether they are one- or two-sided<br><i>Only common tests should be described solely by name; describe more complex techniques in the Methods section.</i>                                                               |
| <input type="checkbox"/>            | <input checked="" type="checkbox"/> | A description of all covariates tested                                                                                                                                                                                                                     |
| <input type="checkbox"/>            | <input checked="" type="checkbox"/> | A description of any assumptions or corrections, such as tests of normality and adjustment for multiple comparisons                                                                                                                                        |
| <input type="checkbox"/>            | <input checked="" type="checkbox"/> | A full description of the statistical parameters including central tendency (e.g. means) or other basic estimates (e.g. regression coefficient) AND variation (e.g. standard deviation) or associated estimates of uncertainty (e.g. confidence intervals) |
| <input type="checkbox"/>            | <input checked="" type="checkbox"/> | For null hypothesis testing, the test statistic (e.g. $F$ , $t$ , $r$ ) with confidence intervals, effect sizes, degrees of freedom and $P$ value noted<br><i>Give <math>P</math> values as exact values whenever suitable.</i>                            |
| <input checked="" type="checkbox"/> | <input type="checkbox"/>            | For Bayesian analysis, information on the choice of priors and Markov chain Monte Carlo settings                                                                                                                                                           |
| <input checked="" type="checkbox"/> | <input type="checkbox"/>            | For hierarchical and complex designs, identification of the appropriate level for tests and full reporting of outcomes                                                                                                                                     |
| <input checked="" type="checkbox"/> | <input type="checkbox"/>            | Estimates of effect sizes (e.g. Cohen's $d$ , Pearson's $r$ ), indicating how they were calculated                                                                                                                                                         |

*Our web collection on [statistics for biologists](#) contains articles on many of the points above.*

### Software and code

Policy information about [availability of computer code](#)

#### Data collection

DNA sequencing data was obtained using Applied Biosystems SeqStudio Genetic Analyzer.  
Quantitative real-time PCR data was collected using Applied Biosystems QuantStudio 3 Real-Time PCR System.  
Immunoblot data was collected using ChemiDoc MP imaging system (Bio-Rad).  
Flow cytometry data was collected using BD LSR II and the BD FACSDiva software

#### Data analysis

Analysis of bulk population base-editing frequency was performed using the free online software EditR version 1.0.9 available at: [https://moriaritylab.shinyapps.io/editr\\_v10/](https://moriaritylab.shinyapps.io/editr_v10/)  
Immunoblot images were analyzed via Image Lab software (©2017 Bio-Rad Laboratories; version 6.0.1).  
Data graphing and statistical analysis has been done using GraphPad Prism 8 (version 8.4.3).  
Flow cytometry data was analyzed using FlowJo 10.7.1

For manuscripts utilizing custom algorithms or software that are central to the research but not yet described in published literature, software must be made available to editors and reviewers. We strongly encourage code deposition in a community repository (e.g. GitHub). See the Nature Research [guidelines for submitting code & software](#) for further information.

### Data

Policy information about [availability of data](#)

All manuscripts must include a [data availability statement](#). This statement should provide the following information, where applicable:

- Accession codes, unique identifiers, or web links for publicly available datasets
- A list of figures that have associated raw data
- A description of any restrictions on data availability

The datasets generated during and/or analysed during the current study are available from the corresponding author on reasonable request

## Field-specific reporting

Please select the one below that is the best fit for your research. If you are not sure, read the appropriate sections before making your selection.

Life sciences  Behavioural & social sciences  Ecological, evolutionary & environmental sciences

For a reference copy of the document with all sections, see [nature.com/documents/nr-reporting-summary-flat.pdf](https://www.nature.com/documents/nr-reporting-summary-flat.pdf)

## Life sciences study design

All studies must disclose on these points even when the disclosure is negative.

|                 |                                                                                                                                                                                                                                                                                                                                                                                                                                                                                                                                                                                                                                                                                                                                                                                                                                                                            |
|-----------------|----------------------------------------------------------------------------------------------------------------------------------------------------------------------------------------------------------------------------------------------------------------------------------------------------------------------------------------------------------------------------------------------------------------------------------------------------------------------------------------------------------------------------------------------------------------------------------------------------------------------------------------------------------------------------------------------------------------------------------------------------------------------------------------------------------------------------------------------------------------------------|
| Sample size     | <p>Protein studies: Studies examining phospho-STAT1 and total STAT1 levels across the various genotypes before and after interferon stimulation were performed independently a total of 5 times. Samples from independent experiments were subjected to protein electrophoresis separately, and analyzed separately by densitometry. Studies examining the phosphorylation and/or de-phosphorylation kinetics of pSTAT1 were performed in duplicates, subjected to protein electrophoresis separately, and analyzed separately by densitometry.</p> <p>RNA gene expression studies: studies examining gene expression across the various genotypes were each performed a minimum of 5 times, and each sample was run via at least technical duplicates.<br/>The sample sizes chosen above are in keeping with, or above, what is commonly published in similar studies</p> |
| Data exclusions | For gene expression studies, samples for which a Ct value could not be established were followed by repeated measurement compared with the appropriate controls. Following this measure, no data were excluded from the analysis                                                                                                                                                                                                                                                                                                                                                                                                                                                                                                                                                                                                                                           |
| Replication     | Data replicability was ensured by inclusion of data from independent experiments. All data included in this study has been replicable in our lab                                                                                                                                                                                                                                                                                                                                                                                                                                                                                                                                                                                                                                                                                                                           |
| Randomization   | Not applicable                                                                                                                                                                                                                                                                                                                                                                                                                                                                                                                                                                                                                                                                                                                                                                                                                                                             |
| Blinding        | Blinding during data analysis in this study was not possible, as the individual performing the data analysis (OS) also performed considerable parts of the data collection. We believe blinding not to be applicable for this type of study as no therapeutic intervention was tested and no human subjects involved                                                                                                                                                                                                                                                                                                                                                                                                                                                                                                                                                       |

## Reporting for specific materials, systems and methods

We require information from authors about some types of materials, experimental systems and methods used in many studies. Here, indicate whether each material, system or method listed is relevant to your study. If you are not sure if a list item applies to your research, read the appropriate section before selecting a response.

### Materials & experimental systems

| n/a                                 | Involved in the study                                     |
|-------------------------------------|-----------------------------------------------------------|
| <input type="checkbox"/>            | <input checked="" type="checkbox"/> Antibodies            |
| <input type="checkbox"/>            | <input checked="" type="checkbox"/> Eukaryotic cell lines |
| <input checked="" type="checkbox"/> | <input type="checkbox"/> Palaeontology and archaeology    |
| <input checked="" type="checkbox"/> | <input type="checkbox"/> Animals and other organisms      |
| <input checked="" type="checkbox"/> | <input type="checkbox"/> Human research participants      |
| <input checked="" type="checkbox"/> | <input type="checkbox"/> Clinical data                    |
| <input checked="" type="checkbox"/> | <input type="checkbox"/> Dual use research of concern     |

### Methods

| n/a                                 | Involved in the study                              |
|-------------------------------------|----------------------------------------------------|
| <input checked="" type="checkbox"/> | <input type="checkbox"/> ChIP-seq                  |
| <input type="checkbox"/>            | <input checked="" type="checkbox"/> Flow cytometry |
| <input checked="" type="checkbox"/> | <input type="checkbox"/> MRI-based neuroimaging    |

## Antibodies

### Antibodies used

The following primary antibodies were used for the purpose of immunoblotting and/or immunofluorescence:  
Rabbit anti-pSTAT1 (pY701; clone D4A7; Cell Signaling 7649S)  
Rabbit anti-Total STAT1 (Cell Signaling; clone D1K9Y; 14994)  
Mouse anti-alpha-tubulin (clone DM1A; Sigma Aldrich T6199-100UL).

The following secondary antibodies were used:  
Donkey anti-Rabbit IgG (H+L) Highly Cross-Adsorbed Secondary Antibody, Alexa Fluor 647 (Thermo Fisher Scientific A-31573)  
Donkey anti-Mouse IgG (H+L) Highly Cross-Adsorbed Secondary Antibody, Alexa Fluor 647 (Thermo Fisher Scientific A-31571).  
Goat anti-Rabbit IgG (H+L) Cross-Adsorbed Secondary Antibody, Alexa Fluor 555 (Thermo Fisher Scientific A-21428).

### Validation

1) Rabbit anti-pSTAT1 (pY701; clone D4A7; Cell Signaling 7649S): this antibody has been validated by the manufacturer to be reactive against human pSTAT1 (Tyr701). Western blotting proposed antibody concentration and sample images provided by the manufacturer website: <https://www.cellsignal.com/products/primary-antibodies/phospho-stat1-tyr701-d4a7-rabbit-mab/7649>. The antibody has been successfully validated by a number of studies. The website provides 12 citations which have used this antibody for Western Blotting, with Homo sapiens reactivity

2) Rabbit anti-Total STAT1 (Cell Signaling; clone D1K9Y; 14994): this antibody has been validated by the manufacturer to be reactive against human STAT1. Western blotting proposed antibody concentration and sample images provided by the manufacturer website: <https://www.cellsignal.com/products/primary-antibodies/stat1-d1k9y-rabbit-mab/14994>. The antibody has been successfully validated by a number of studies. The website provides 7 citations which have used this antibody for Western Blotting, with Homo sapiens reactivity

3) Mouse anti-alpha-tubulin (Clone DM1A; Sigma Aldrich T6199-100UL): this antibody has been validated by the manufacturer to be reactive against human Alpha-tubulin. Western blotting proposed antibody concentration and sample images provided by the manufacturer website: <https://www.sigmaaldrich.com/catalog/product/sigma/t6199?lang=en&region=CA>. The antibody has been successfully validated by a number of studies. The website provides a total of 1582 citations which have used this antibody, of which at least 10 used it for Western blotting with homo sapiens reactivity

## Eukaryotic cell lines

Policy information about [cell lines](#)

|                                                                      |                                                                                                                                                                             |
|----------------------------------------------------------------------|-----------------------------------------------------------------------------------------------------------------------------------------------------------------------------|
| Cell line source(s)                                                  | Wildtype HAP1 cells were kind gift of Dr. Aleixo Muise lab (Toronto). Wildtype human fibroblasts were purchased from ATCC                                                   |
| Authentication                                                       | Cell line authentication for HAP1 cells was done via short-tandem repeat (STR) analysis, performed by The Hospital for Sick Children The Centre for Applied Genomics (TCAG) |
| Mycoplasma contamination                                             | Cells were confirmed to be Mycoplasma-free using a PCR Mycoplasma Detection Kit (Applied Biological Materials Inc. G238).                                                   |
| Commonly misidentified lines<br>(See <a href="#">ICLAC</a> register) | N/A                                                                                                                                                                         |

## Flow Cytometry

### Plots

Confirm that:

- The axis labels state the marker and fluorochrome used (e.g. CD4-FITC).
- The axis scales are clearly visible. Include numbers along axes only for bottom left plot of group (a 'group' is an analysis of identical markers).
- All plots are contour plots with outliers or pseudocolor plots.
- A numerical value for number of cells or percentage (with statistics) is provided.

### Methodology

|                                                                                                                                                           |                                                                                                                                                                                                                                                                                                                                                                                                                                                                                                                                                                                                                                              |
|-----------------------------------------------------------------------------------------------------------------------------------------------------------|----------------------------------------------------------------------------------------------------------------------------------------------------------------------------------------------------------------------------------------------------------------------------------------------------------------------------------------------------------------------------------------------------------------------------------------------------------------------------------------------------------------------------------------------------------------------------------------------------------------------------------------------|
| Sample preparation                                                                                                                                        | Flow cytometry was employed for the purpose of DNA-content analysis. HAP1 cells were compared with wildtype human fibroblasts known to be diploid. cells were washed with 1xPBS (Wisent Bioproducts 311-010-CL), trypsinized, and resuspended in complete media (1x10 <sup>6</sup> cells/μl), to which a low-toxicity, cell-permeable DNA dye (Vybrant DyeCycle Violet™; 1:1000, Thermo Fisher Scientific V35003) was added. Cells were incubated at 37°C for 30 minutes. Live/dead cell stain was concurrently performed using propidium iodide (1μg/μL; Thermo Fisher Scientific P1304MP), added according to manufacturer recommendation. |
| Instrument                                                                                                                                                | Samples were run on BD LSR-II                                                                                                                                                                                                                                                                                                                                                                                                                                                                                                                                                                                                                |
| Software                                                                                                                                                  | BD FACSDiva™ software v9.0 was used for data acquisition.<br>FlowJo 10.7.1 was used for data analysis                                                                                                                                                                                                                                                                                                                                                                                                                                                                                                                                        |
| Cell population abundance                                                                                                                                 | Following exclusion of cell debris, 64.8-70.8% were included for further analysis. Following single-cell discrimination by FSC, 68.2-93% of above cells were included for further analysis. Following second step of single-cell discrimination by SSC, 93-95.8% of above cells were included for further analysis. Following dead cell exclusion, 86.7-99.6% of above cells were included in the final analysis                                                                                                                                                                                                                             |
| Gating strategy                                                                                                                                           | As a first step, plotting of FSC-A vs. SSC-A was used to gate out debris. Doublet exclusion subsequently followed using two steps, first using the FSC (FSC-A vs. FSC-H) followed by SSC doublet discrimination (SSC-A vs SSC-H). Then, dead cells were excluded by plotting the G660-A (propidium iodide) fluorescence intensity vs. SSC-H. Events associated with G660-A fluorescence intensity higher than 10 <sup>3</sup> were excluded.                                                                                                                                                                                                 |
| <input checked="" type="checkbox"/> Tick this box to confirm that a figure exemplifying the gating strategy is provided in the Supplementary Information. |                                                                                                                                                                                                                                                                                                                                                                                                                                                                                                                                                                                                                                              |
